# Supplementary material for: SIRT1 mediates obesity- and nutrient-dependent perturbation of pubertal timing by epigenetically controlling Kiss1 expression
Source: PubMed Central journal article supplement (PMC6179991; doi:10.1038/s41467-018-06459-9), 2018-10-10
Supplement: 41467_2018_6459_MOESM1_ESM.pdf [file 41467_2018_6459_MOESM1_ESM.pdf]

## SUPPLEMENTARY INFORMATION FILES

### **SIRT1 mediates obesity- and nutrient-dependent perturbation of pubertal timing by epigenetically controlling *Kiss1* expression**

M.J. Vazquez<sup>1,2,3,4\*</sup>, C.A. Toro<sup>5\*</sup>, J.M. Castellano<sup>1,2,3,4</sup>, F. Ruiz-Pino<sup>1,2,3,4</sup>, J. Roa<sup>1,2,3,4</sup>, D. Beiroa<sup>6</sup>, V. Heras<sup>1,2,3</sup>, I. Velasco<sup>1,2,3,4</sup>, C. Dieguez<sup>4,6</sup>, L. Pinilla<sup>1,2,3,4</sup>, F. Gaytan<sup>1,2</sup>, R. Nogueiras<sup>4,6</sup>, M. A. Bosch<sup>7</sup>, O.K. Rønnekleiv<sup>7,8</sup>, A. Lomniczi<sup>5</sup>, S.R. Ojeda<sup>8</sup>, M. Tena-Sempere<sup>1,2,3,4,9</sup>

<sup>1</sup>Instituto Maimónides de Investigación Biomédica de Córdoba (IMIBIC); <sup>2</sup>Department of Cell Biology, Physiology and Immunology, University of Córdoba; <sup>3</sup>Hospital Universitario Reina Sofía; and <sup>4</sup>CIBER Fisiopatología de la Obesidad y Nutrición, Instituto de Salud Carlos III, 14004 Córdoba, Spain; <sup>5</sup>Division of Genetics, Oregon National Primate Research Center/Oregon Health and Science University, Beaverton, Oregon USA; <sup>6</sup>Department of Physiology, Faculty of Medicine and CIMUS, University of Santiago de Compostela-Instituto de Investigación Sanitaria, 15782 Santiago de Compostela, Spain; <sup>7</sup>Department of Physiology and Pharmacology, Oregon Health and Science University, Portland, Oregon, USA; <sup>8</sup>Division of Neuroscience, Oregon National Primate Research Center/Oregon Health and Science University, Beaverton, Oregon USA; and <sup>9</sup>FiDiPro Program, University of Turku, Turku, Finland

\* These authors contributed equally to this work and should be considered joint first authors

**Short Title:** Obesity alters puberty onset via SIRT1/Kiss1

**Key Words:** Sirt1, sirtuins, Kiss1, kisspeptins, obesity, undernutrition, puberty

**Corresponding authors:** Alejandro Lomniczi (lomniczi@ohsu.edu) and

Manuel Tena-Sempere (fi1tesem@uco.es)

Department of Cell Biology, Physiology & Immunology

Faculty of Medicine, University of Córdoba

Avda. Menéndez Pidal s/n. 14004 Córdoba, SPAIN

## **SUPPLEMENTARY FIGURES**

**Supplementary Figure 1**

**Supplementary Figure 2**

**Supplementary Figure 3**

**Supplementary Figure 4**

**Supplementary Figure 5**

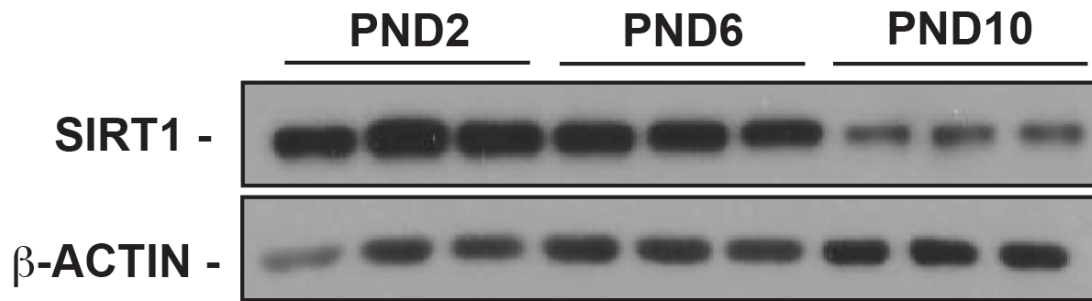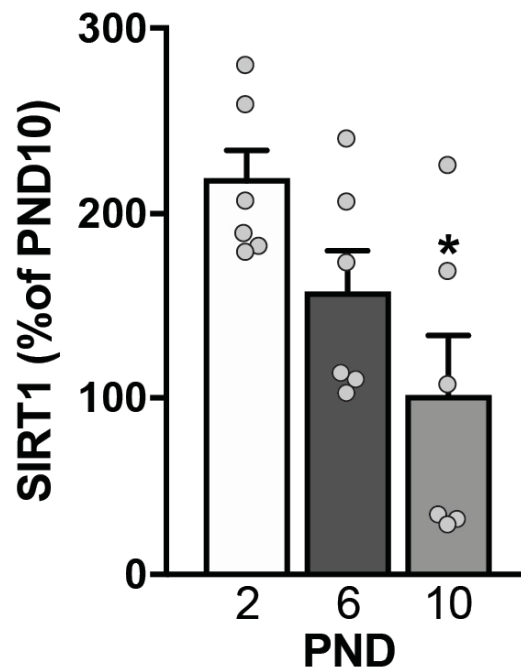

**Supplementary Figure 1:** SIRT1 content in the preoptic area (POA)-medial basal hypothalamus (MBH) unit of immature female rats, at postnatal day (PND) 2, 6 and 10. Representative Western blots are presented in the upper panel. The bar histograms represent the mean  $\pm$  SEM. \* $p < 0.05$  (One way ANOVA followed by the Student-Newman-Keuls test). N=6 animals/group. PND2= white bar; PND6= dark grey bar; PND10= light grey bar.

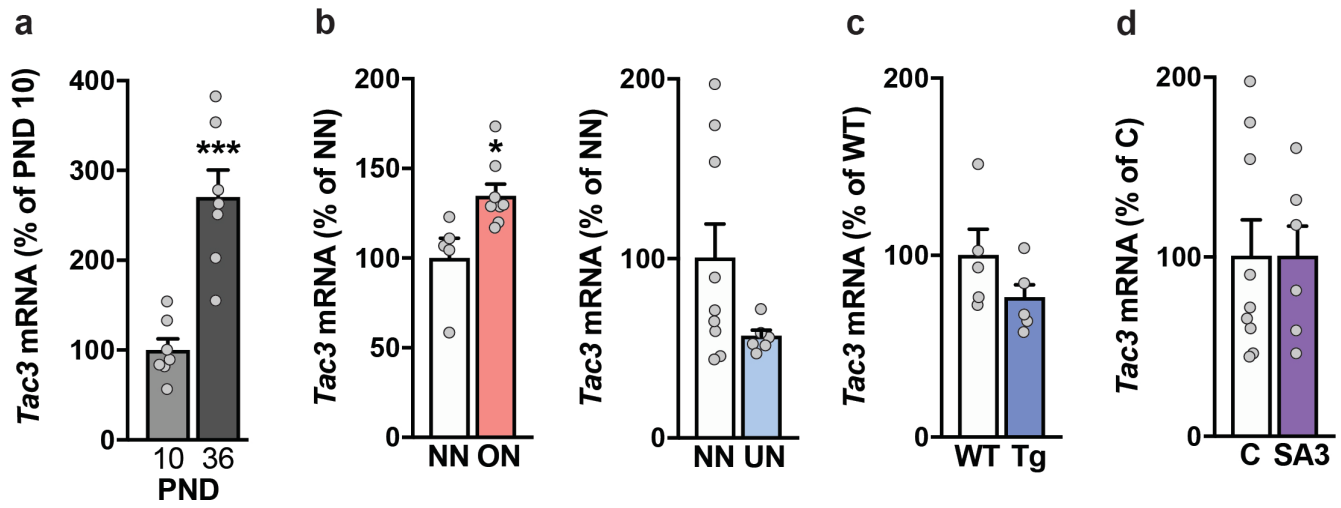

**Supplementary Figure 2:** Levels of *Tac3* mRNA in hypothalamic samples from various female rat models, with normal or altered puberty. (a) *Tac3* mRNA levels in the medial basal hypothalamus (MBH) of female rats, at postnatal day (PND) 10 (infantile) or PND36 (pubertal). (b) *Tac3* mRNA levels in the MBH of female rats, fed normally (NN) or subjected to postnatal overnutrition (ON; samples taken at PND29) or under-nutrition (UN; samples taken at PND36). (c) *Tac3* mRNA levels in the hypothalamus of a transgenic model of moderate *Sirt1* over-expression (Tg), and their respective WT controls, at PND32. (d) Hypothalamic *Tac3* mRNA levels in a rat model of central activation of SIRT1 with the allosteric activator, SA3. The bar histograms represent the mean  $\pm$  SEM. \* $p < 0.05$ ; \*\*\* $p < 0.001$  (two-sided Student-t test). PND10= light grey bars; PND36= dark grey bars; NN= white bars; ON= light red bars; UN= light blue bars; WT= white bars; Tg= cyan bars; SA3= violet bars.



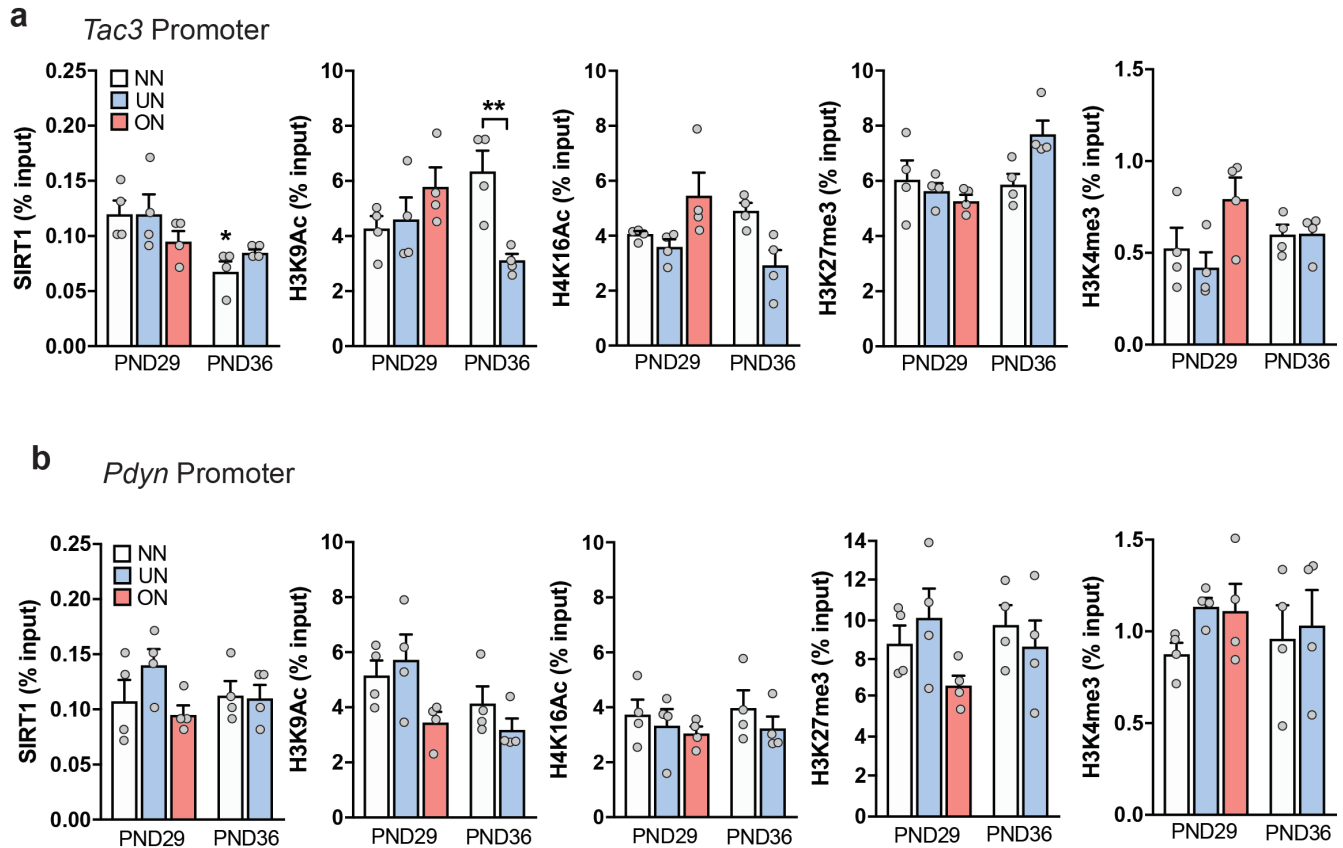

**Supplementary Figure 3:** Chromatin Immunoprecipitation (ChIP) assays showing the association of SIRT1, H3K9Ac, H4K16Ac, H3K27me3 and H3K4me3 to the *Tac3* promoter (**a**; upper panels) and *Pdyn* promoter (**b**; lower panels) in the medial basal hypothalamus (MBH) of female rats fed normally (NN) or subjected to postnatal nutritional manipulation (overnutrition, ON; undernutrition, UN). The results are expressed as % of the signal generated by input DNA. The bar histograms represent the mean  $\pm$  SEM. \* $p < 0.05$ ; \*\* $p < 0.01$  (One way ANOVA followed by the Student-Newman-Keuls). For all panels  $n = 4$  animals/ group. NN= white bars; ON= light red bars; UN= light blue bars.

***Kiss1* prom**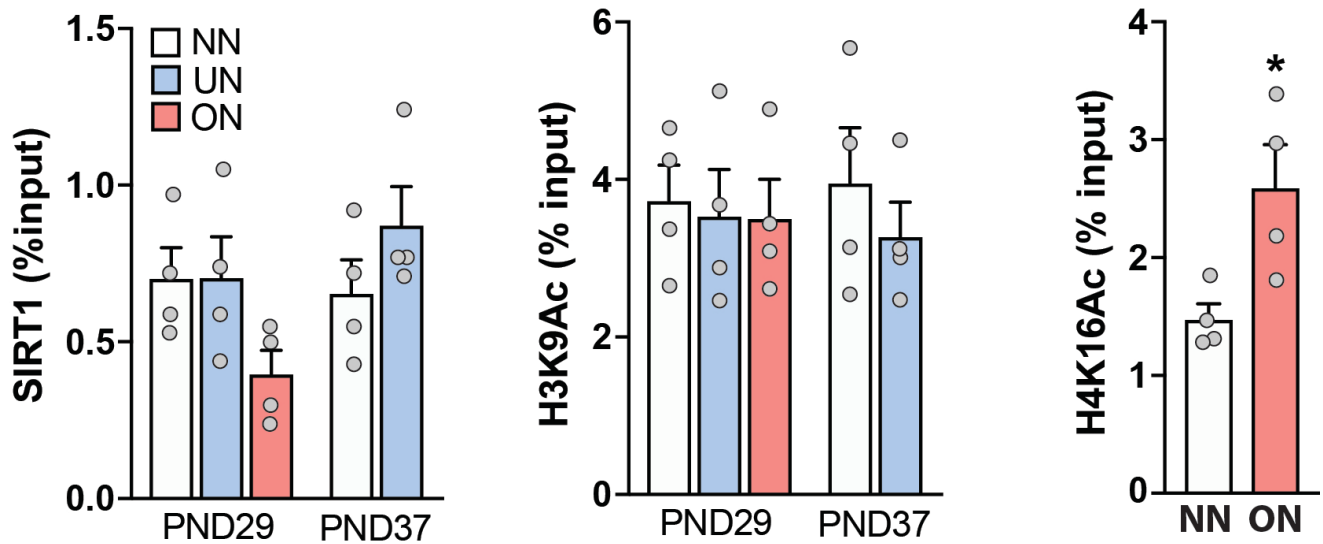

**Supplementary Figure 4:** Chromatin Immunoprecipitation (ChIP) assays of the association of SIRT1, H3K9Ac and H4K16Ac to the *Kiss1* promoter in the hypothalamic preoptic area (POA), encompassing the AVPV, of female rats fed normally (NN) or subjected to postnatal nutritional manipulation (overnutrition, ON; or undernutrition, UN). NN and UN samples were obtained at PND29 and PND36, while samples from ON rats were obtained only at PND29. The results are expressed as % of the signal generated by input DNA. The bar histograms represent the mean  $\pm$  SEM. \* $p < 0.05$  (One way ANOVA followed by the Student-Newman-Keuls, except for right panel data: two-sided Student-t test). For all panels  $n = 4$  animals/ group. NN= white bars; ON= light red bars; UN= light blue bars.

**Supplementary Figure 5:** Uncropped scans of Western blots included in the study. Reference to figure and panel is include for each blot.

See the blots in the following pages.

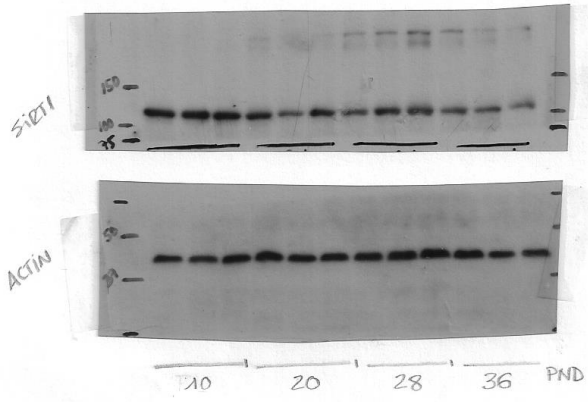

Fig 1a

WB from Figure 1.a

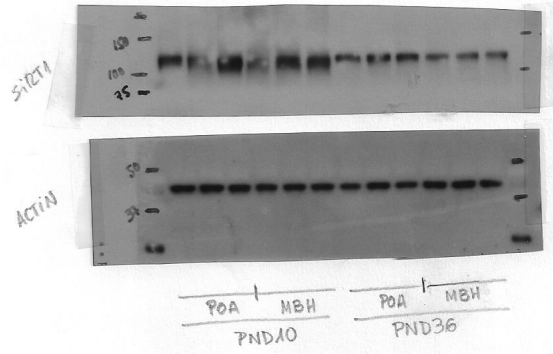

Fig 1b

WB from Figure 1.b

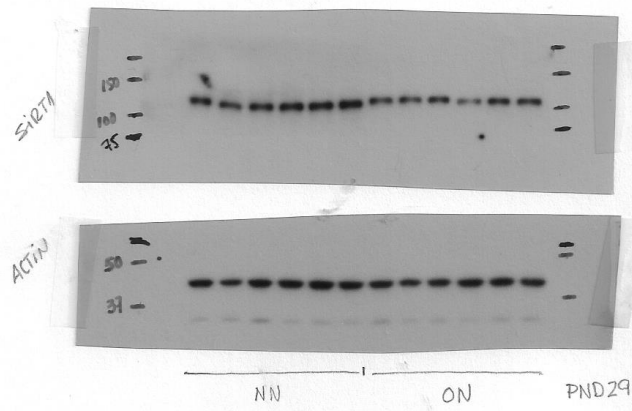

Fig 1c

WB from Figure 1.c

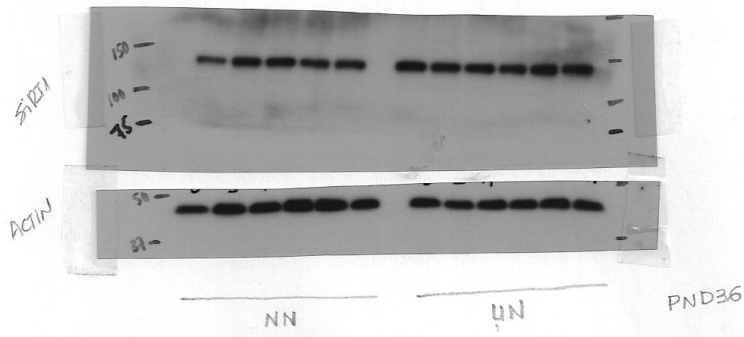

WB from Figure 2.a

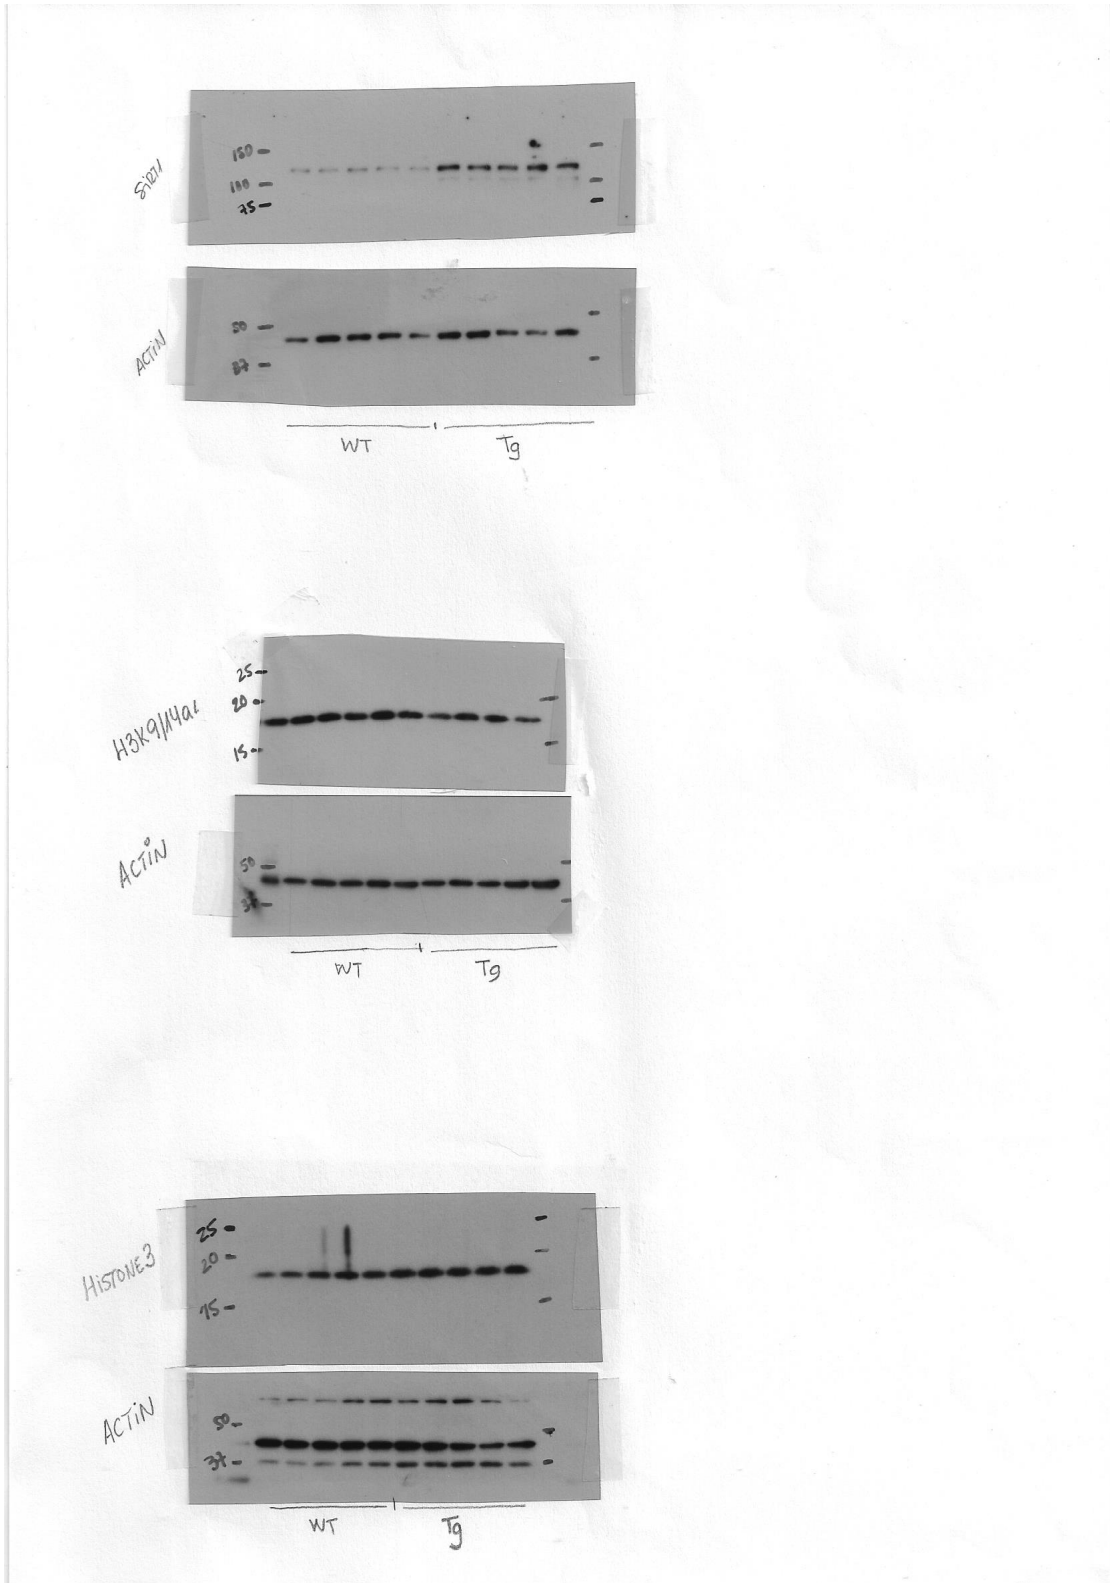

WB from Figures 3.b-c



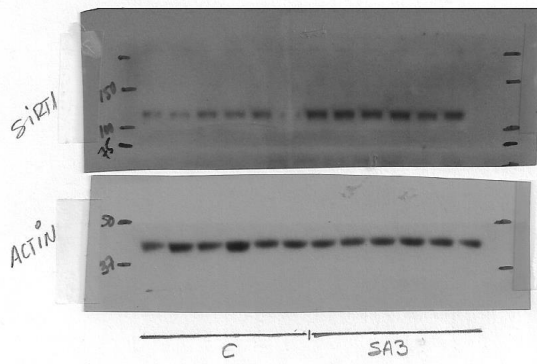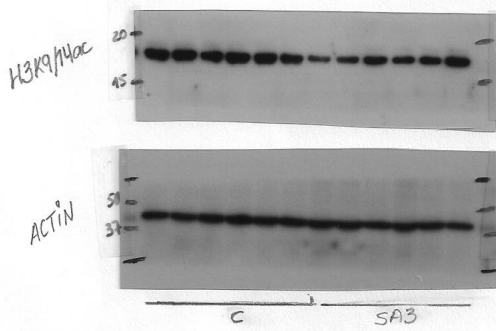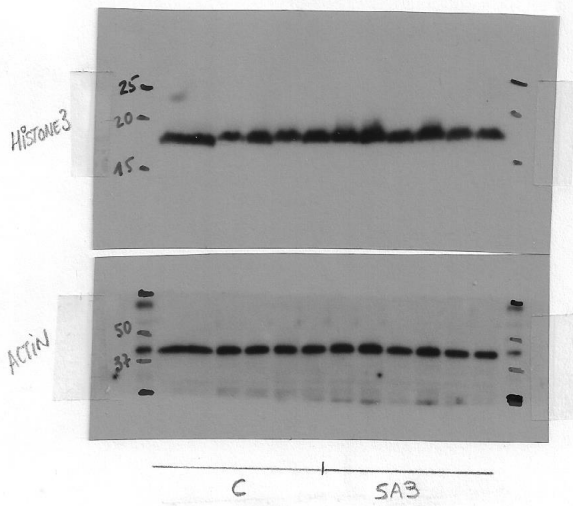

WB from Figures 4.f-g

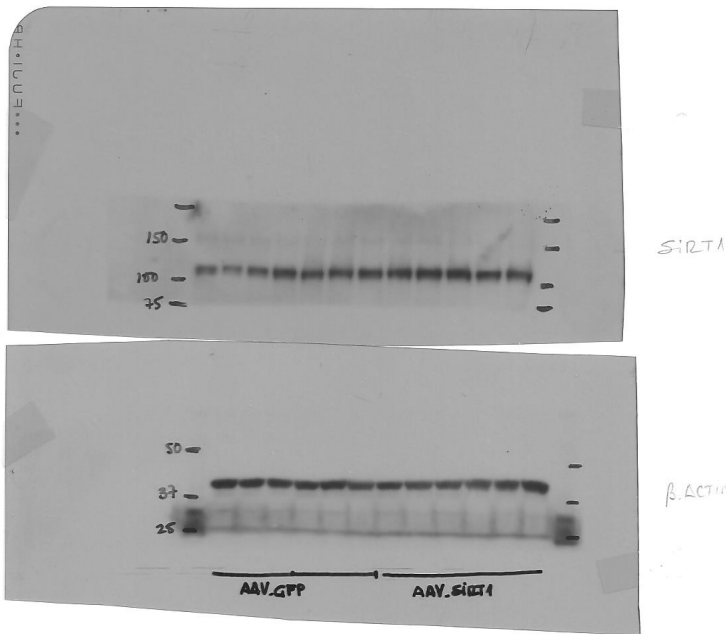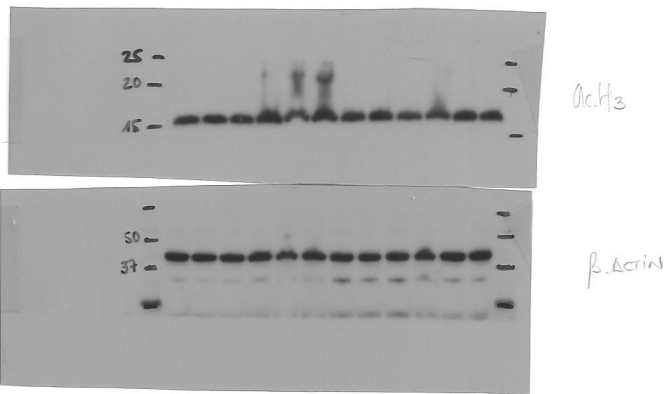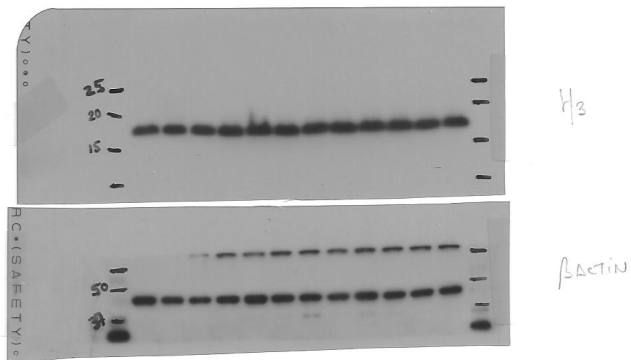

WB from Figure 5.e

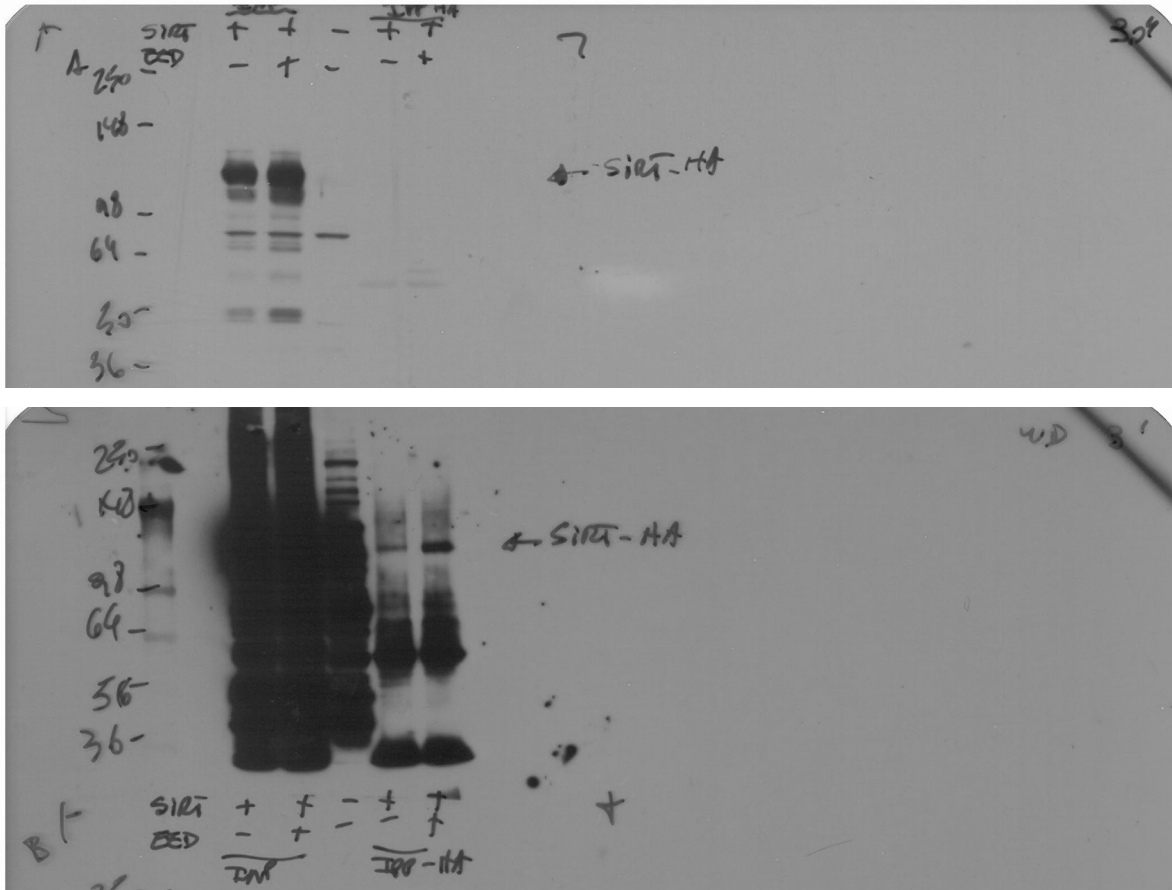

WB from Figure 8.b (left-upper panels; two different exposures of the same blot are shown)

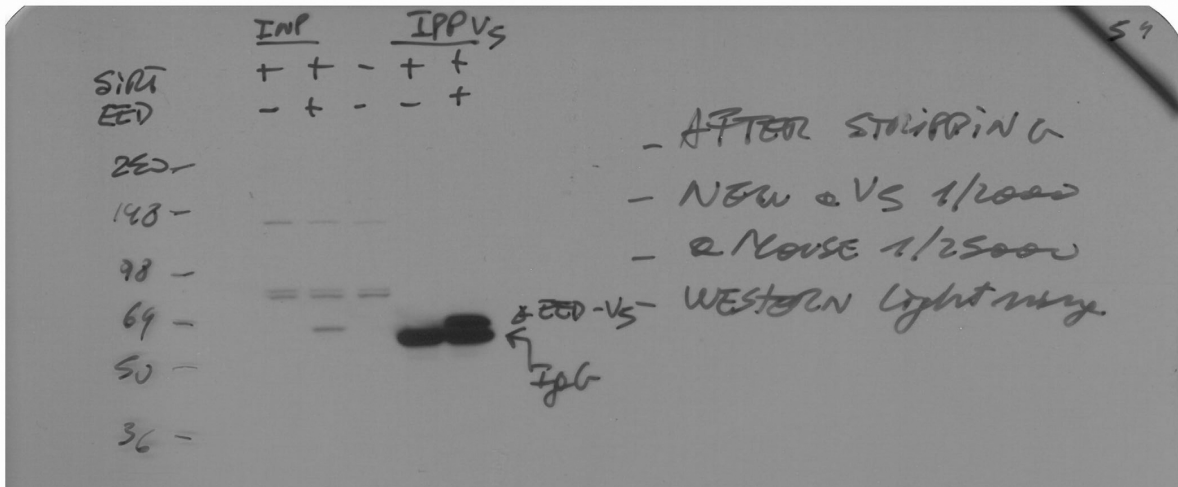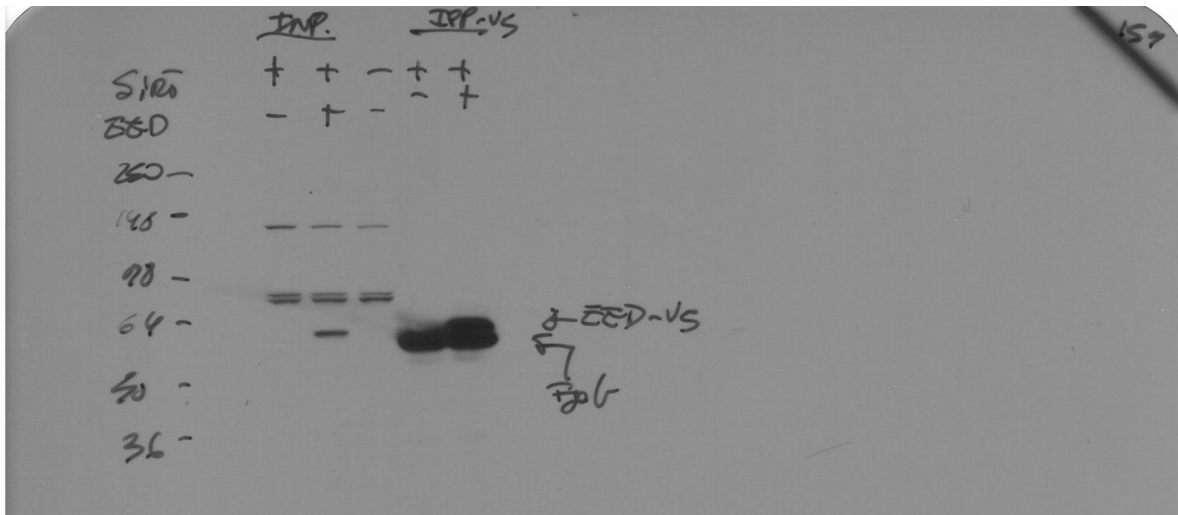

WB from Figure 8.b (left-lower panels; two different exposures of the same blot are shown)

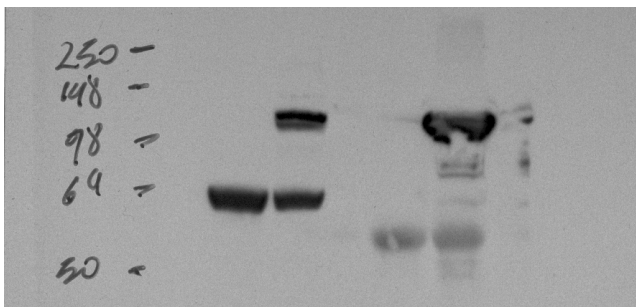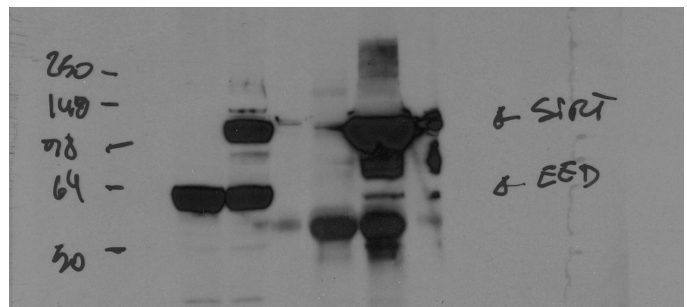

WB from Figure 8.b (right panels; two different exposures of the same blot are shown)

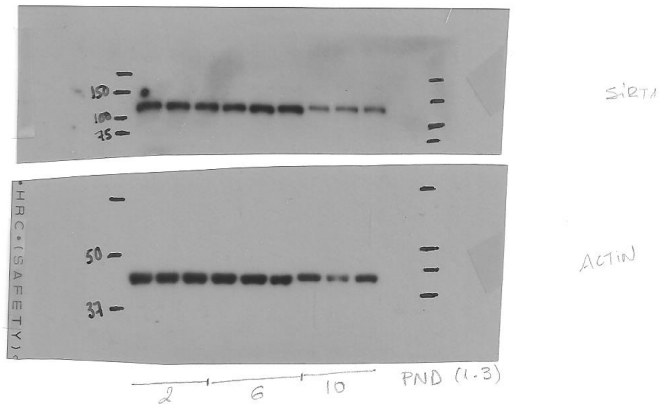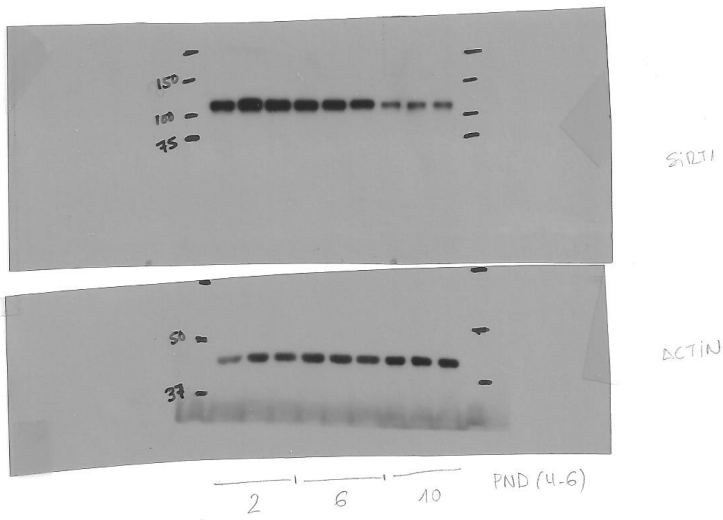

WB from Supplementary Figure 1

## SUPPLEMENTARY TABLES

**Supplementary Table 1:** List of primary antibodies used in the different analytical methods.

Source information and dilutions are also provided.

| <b>Chromatin Immunoprecipitation (ChIP) Assays</b> |             |                 |                  |                          |
|----------------------------------------------------|-------------|-----------------|------------------|--------------------------|
| <b>Target</b>                                      | <b>Host</b> | <b>Source</b>   | <b>Catalog #</b> | <b>Dilution/Quantity</b> |
| $\beta$ -Galactosidase                             | Mouse       | ICN Biomedicals | 55976            | 3 $\mu$ g/reaction       |
| $\beta$ -Galactosidase                             | Rabbit      | Cortex Biochem  | CR7001RP2        | 3 $\mu$ g/reaction       |
| EED                                                | Mouse       | Millipore       | 05-1320          | 3 $\mu$ g/reaction       |
| H3K4me3                                            | Rabbit      | Active Motif    | 39159            | 3 $\mu$ g/reaction       |
| H3K9ac                                             | Rabbit      | Active Motif    | 39917            | 3 $\mu$ g/reaction       |
| H4K16ac                                            | Rabbit      | Active Motif    | 39167            | 3 $\mu$ g/reaction       |
| H3K27me3                                           | Rabbit      | Active Motif    | 39155            | 3 $\mu$ g/reaction       |
| SIRT1                                              | Rabbit      | Santa Cruz      | sc-15404         | 3 $\mu$ g/reaction       |
| <b>Immunohistofluorescence (IHF)</b>               |             |                 |                  |                          |
| SIRT1                                              | Mouse       | Santa Cruz      | sc-74504         | 1/1000                   |
| Kisspeptin                                         | Rabbit      | Millipore       | AB9754           | 1/2000                   |
| GFP                                                | Chicken     | Abcam           | ab13970          | 1/5000                   |
| <b>Immunoprecipitation (IPP)</b>                   |             |                 |                  |                          |
| HA                                                 | Rabbit      | Abcam           | ab9110           | 5 $\mu$ g/reaction       |
| V5                                                 | Mouse       | Thermo Fisher   | MA5-15253        | 5 $\mu$ g/reaction       |
| <b>Western Blot</b>                                |             |                 |                  |                          |
| SIRT1                                              | Mouse       | Cell Signaling  | 8469S            | 1/1000                   |
| Histone 3 (H3)                                     | Rabbit      | Millipore       | 06-755           | 1/5000                   |
| H3K9/14ac                                          | Rabbit      | Millipore       | 06-599           | 1/10000                  |
| $\beta$ -Actin                                     | Rabbit      | Sigma Aldrich   | A5060            | 1/5000                   |
| HA                                                 | Rabbit      | Abcam           | ab9110           | 1/1000                   |
| V5                                                 | Mouse       | Thermo Fisher   | MA5-15253        | 1/1000                   |

**Supplementary Table 2:** List of primers used in the different analytical methods.

| <b>Expression analyses (qPCR)</b>                  |                        |                                                |
|----------------------------------------------------|------------------------|------------------------------------------------|
| <b>Target</b>                                      | <b>Primer Name</b>     | <b>Sequence</b>                                |
| Rat <i>Kiss1</i>                                   | <i>rKiss1-forward1</i> | 5'-GCTGCTGCTTCTCCTCTGTG-3'                     |
|                                                    | <i>rKiss1-reverse1</i> | 5'-GCATACCGCGGGCCCTTTT-3'                      |
|                                                    | <i>rKiss1-forward2</i> | 5'-TGGTGAACCCCTGAACCCACAGGC-3'                 |
|                                                    | <i>rKiss1-reverse2</i> | 5'-CGGCGGGCATGGCGATGTT-3'                      |
| Rat <i>Tac3</i>                                    | <i>rTac3-forward1</i>  | 5'-CAGCTTGGCATGGACCTTC-3'                      |
|                                                    | <i>rTac3-reverse1</i>  | 5'-TAGCCTTGCTCAGCACTTTCA-3'                    |
| Mouse <i>Sirt1</i>                                 | <i>mSirt1-forward1</i> | 5'-GACAGAACGTCACACGCCAG-3'                     |
|                                                    | <i>mSirt1-reverse1</i> | 5'-TTGTTCGAGGATCGGTGCCAA-3'                    |
| <i>Rps11</i> (r, m)                                | <i>Rps11-forward</i>   | 5'-CATTCAAGACGGAGCGTGCTTA-3'                   |
|                                                    | <i>Rps11-reverse</i>   | 5'-TGCATCTTCATCTTCGTCAC-3'                     |
| Mouse <i>GAPDH</i>                                 | <i>Gapdh-forward</i>   | 5'-CTTCTTGTGCAGTGCCAGCC-3'                     |
|                                                    | <i>Gapdh-reverse</i>   | 5'-CAAGAGAAGGCAGCCCTGGT-3'                     |
| Mouse <i>Ppia</i>                                  | <i>Ppia-forward</i>    | 5'-GGCAAATGCTGGACCAAACACAA-3'                  |
|                                                    | <i>Ppia-reverse</i>    | 5'-GGTAAAATGCCCGCAAGTCAAAGA-3'                 |
| <b>Molecular Cloning</b>                           |                        |                                                |
| Rat <i>Eed</i>                                     | <i>Eed-forward</i>     | 5'-AATAGGATCCACCAT GTCTGAGAGGGAAGTGTGACTGCG-3' |
|                                                    | <i>Eed-reverse</i>     | 5'-TACTGATATCTCGAAGTCGAT CCCAACGCCAAATGCT-3'   |
| <b>Chromatin Immunoprecipitation (ChIP) Assays</b> |                        |                                                |
| Rat <i>Kiss1</i>                                   | <i>rKiss1-forward3</i> | 5'-TCGGGCAGCCAGATAGAGGAAGC-3'                  |
|                                                    | <i>rKiss1-reverse3</i> | 5'-TTGAGGGCCGAGGGAGAAGAG-3'                    |
| Rat <i>Tac3</i>                                    | <i>rTac3-forward2</i>  | 5'-ACGTGCGTGTCTGGGTATGTGA-3'                   |
|                                                    | <i>rTac3-reverse2</i>  | 5'-GGAGGGTTTGGGGGAGTCG-3'                      |
| Rat <i>ProDyn</i>                                  | <i>rProDyn-forward</i> | 5'-CTGCCTTTCTCCTACTTTTGTCTCTGTTTT-3'           |
|                                                    | <i>rProDyn-reverse</i> | 5'-CGGGGGTGGATTCTCGGTGTAG-3'                   |
| <b>Single Cell RT-PCR</b>                          |                        |                                                |
| Mouse <i>Sirt1</i>                                 | <i>mSirt1-forward2</i> | 5'-TGACGCTGTGGCAGATTG-3'                       |
|                                                    | <i>mSirt1-reverse2</i> | 5'-CAAGGCGAGCATAGATACCG-3'                     |
| Mouse <i>Kiss1</i>                                 | <i>mKiss1-forward</i>  | 5'-TGCTGCTTCTCCTCTGT-3'                        |
|                                                    | <i>mKiss1-reverse</i>  | 5'-ACCGCGATTCTTTTCC-3'                         |
| <b>In situ hybridization (Probes)</b>              |                        |                                                |
| Mouse <i>Kiss1</i>                                 | <i>rKiss1-forward4</i> | 5'-ATGATCTCGCTGGCTTCTTGGCAG-3'                 |
|                                                    | <i>rKiss1-reverse4</i> | 5'-TCAGCCCCGTGCCGCCCGCGC-3'                    |
| Mouse <i>Sirt1</i>                                 | <i>mSirt1-forward3</i> | 5'-ATGACAGAGCATCACACGCA-3'                     |
|                                                    | <i>mSirt1-reverse3</i> | 5'-CTGCAACCTGCTCCAAGGTA-3'                     |
